# Supplementary material for: Dynamic Changes of Phenolic Composition, Antioxidant Capacity, and Gene Expression in ‘Snow White’ Loquat (Eriobotrya japonica Lindl.) Fruit throughout Development and Ripening
Source: MDPI journal article supplement (doi:10.3390/ijms25010080), 2023-12-20
Supplement: s1 [file s1]

## Supplementary Tables

**Table S1.** Relevant nutritional quality indicators of SW loquat

| Stage | Soluble sugars (%) | Total soluble solids (%) | Titrateable acidity (%) | Vitamin C (mg/100g FW) | SSC/TA | TSS/TA |
|-------|--------------------|--------------------------|-------------------------|------------------------|--------|--------|
| S9    | 13.69±0.27         | 11.29±0.24               | 0.35±0.006              | 1.93±0.17              | 39.5   | 32.57  |

**Table S2.** Authentic standard phenolic compounds used in the HPLC analysis and equations of standard curves

| Phenolic compounds      | Linear regression equation | Correlation coefficient |
|-------------------------|----------------------------|-------------------------|
| Chlorogenic acid        | $y = 25.947x + 510.86$     | 0.9954                  |
| Neochlorogenic acid     | $y = 16.445x + 141.66$     | 0.9981                  |
| Cryptochlorogenic acid  | $y = 9.2498x + 49.317$     | 0.9998                  |
| 4-hydroxybenzoic acid   | $y = 11.676x + 48.378$     | 0.9995                  |
| Vanillic acid           | $y = 16.120x + 52.804$     | 0.9998                  |
| Epicatechin             | $y = 6.9703x + 47.318$     | 0.9991                  |
| Ellagic acid            | $y = 10.753x + 45.311$     | 0.9985                  |
| Salicylic acid          | $y = 5.9264x + 8.3776$     | 0.9992                  |
| Rutin                   | $y = 14.243x + 19.973$     | 0.9999                  |
| Gallic acid             | $y = 23.535x + 51.863$     | 0.9994                  |
| Cinnamic acid           | $y = 26.625x + 475.59$     | 0.9967                  |
| <i>p</i> -coumaric acid | $y = 80.188x - 333.47$     | 0.9997                  |
| Ferulic acid            | $y = 70.277x + 188.01$     | 0.9981                  |
| Caffeic acid            | $y = 61.044x + 260.12$     | 0.9977                  |
| Sinapic acid            | $y = 82.507x + 670.13$     | 0.9992                  |
| Coumaryl alcohol        | $y = 0.2428x + 4.0361$     | 0.9942                  |
| Coniferyl alcohol       | $y = 2.9723x + 19.880$     | 0.9997                  |
| Sinapyl alcohol         | $y = 49.318x + 99.461$     | 0.9996                  |

**Table S3.** Primers for real-time PCR

| Gene            | Forward primer sequence (5'- 3') | Reverse primer sequence (5'- 3') |
|-----------------|----------------------------------|----------------------------------|
| <i>Actin</i>    | AATGGAAGTGGAAATGGTCAAGGC         | TGCCAGATCTTCTCCATGTCATCCCA       |
| <i>PAL1</i>     | TGCTACAGAATCAGGCCACA             | GCATGGAGTGACGTTGTTGT             |
| <i>PAL2</i>     | TTTGCCTACATTGATGAC               | CATTCTTCTCACTCTCAC               |
| <i>PAL3</i>     | CAGTGCTACATATCCTCTAA             | CATCTCCTTCTCACCATT               |
| <i>C4H1</i>     | CCCGATATTAAGGCCGTTTT             | GCTTCGAGGATGTGGTCAAT             |
| <i>C4H2</i>     | CTCCTTCTTCCCCACATGAA             | GGACTCCTCCTCCAAAAACC             |
| <i>C4H3</i>     | AGTCGAAGGTGGAGGCTAAC             | ACTGTCCACCTTTCTCCGAG             |
| <i>4CL2</i>     | TGGACGGAGAGAATCCAAAC             | GCTCCAGCAGCGTACCTATC             |
| <i>4CL9</i>     | AGTCTCACAGGGATATGGGATG           | GACATCAGCCTTCCATTAGCTC           |
| <i>HCT</i>      | CTACAGGCCGAATCCAAACG             | CCGCCTCAACAAACAGAACA             |
| <i>CCoAOMT5</i> | ATGGAGAGGAGCAGCAAAC              | ATTCAGGCTCCCTTGGGTAC             |
| <i>F5H</i>      | ACGACAAGTCCTCCAAGTCCAA           | AGTCCACTTCGTCCCTAACAGA           |
| <i>COMT1</i>    | GGCTGCCCACTCTACCATTA             | CTCCTCCAACATGCTTCACA             |

|              |                       |                       |
|--------------|-----------------------|-----------------------|
| <i>CCR1</i>  | AGAGAAAGGGGTGGACTTGG  | TGCACATAGGCCTGAACTGA  |
| <i>CAD1</i>  | TCTGGAGTTCTCTCGCCGTA  | TGCCATGCTTGTTTCCTTGGA |
| <i>CAD6</i>  | TGGCTCAGACGACTCCAAAT  | TGGTCACATCGTTGATCCCA  |
| <i>POD15</i> | ATGAATCATGCCCCGAATGCC | TCGCAACCATTGACAAAGCA  |
| <i>POD42</i> | GAGAGTCTCTGCCCCAAAGT  | GCTGTGGTGGAGTCTCTTCT  |
| <i>C3H</i>   | GGCTAGCATTGGAACGT     | TGTCTCTGTTTGCTCCGTGT  |

## Supplementary Figure

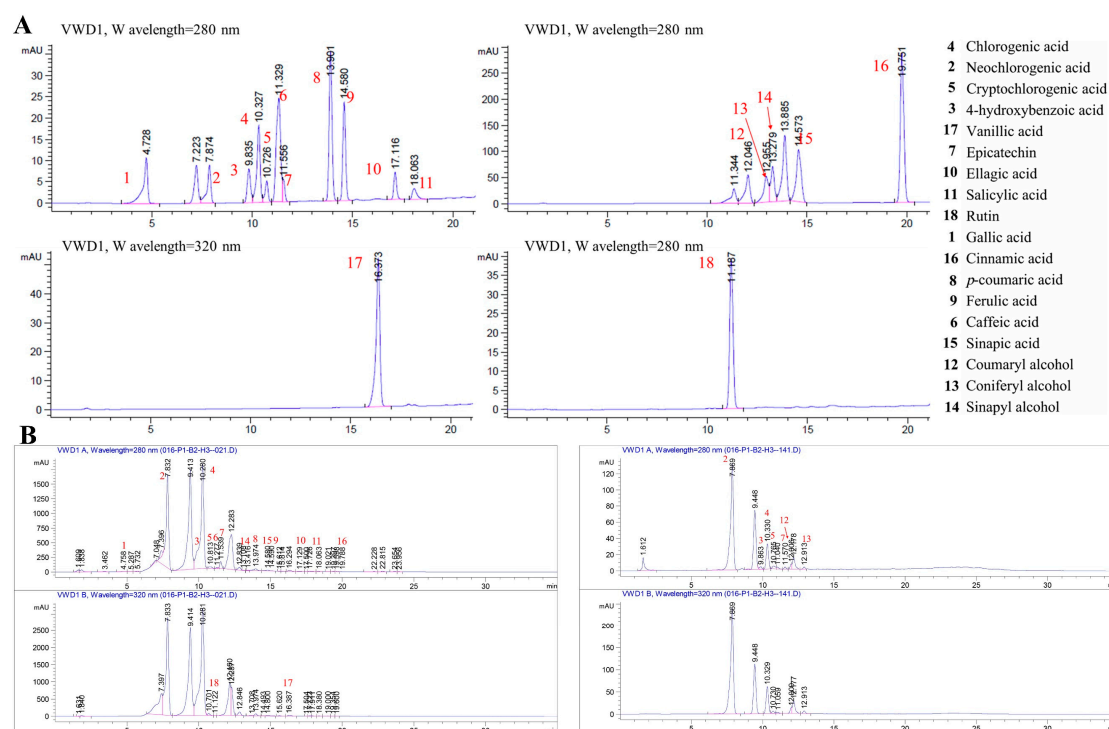

**Figure S1.** The HPLC chromatograms of the phenolic constituents. (A) Chromatogram of polyphenol standard compounds. (B) Chromatograms of methanol-water (80:20, v/v) fruit extracts made at 280 and 320 nm wavelengths, respectively. Peak numbers 1–18 refer to chlorogenic acid, neochlorogenic acid, cryptochlorogenic acid, 4-hydroxybenzoic acid, vanillic acid, epicatechin, ellagic acid, salicylic acid, rutin, gallic acid, cinnamic acid, *p*-coumaric acid, ferulic acid, caffeic acid, sinapic acid, coumaryl alcohol, coniferyl alcohol, and sinapyl alcohol, respectively.
